# Supplementary material for: Circulating uridine dynamically and adaptively regulates food intake in humans
Source: PubMed Central journal article supplement — Cell Rep Med. 2023 Jan 17;4(1):100897. doi: 10.1016/j.xcrm.2022.100897 (PMC9873946; doi:10.1016/j.xcrm.2022.100897), 2023-01-17
Supplement: mmc1.pdf [file mmc1.pdf]

**Cell Reports Medicine, Volume 4**

**Supplemental information**

**Circulating uridine dynamically and adaptively  
regulates food intake in humans**

**Ruth Hanssen, Lionel Rigoux, Kerstin Albus, Alina Chloé Kretschmer, Sharmili Edwin Thanarajah, Weiyi Chen, Yvonne Hinze, Patrick Giavalisco, Sophie M. Steculorum, Oliver A. Cornely, Jens C. Brüning, and Marc Tittgemeyer**

## Supplemental tables

### Questionnaires and buffet composition

**Table S1: Questionnaires**

English translation of the prior activity questionnaire and the buffet questionnaire ; related to STAR Methods Methods details

|                                     | <b>Study 1g</b>                                                                                                                                                                                                                                                                                                                                                                                                                                                                                                                                                                                                                                                                                                       | <b>Study 0.5g</b>                                                                                                                                                                                                                                                                                                                                                                                                                                                                                                                                                                                                                             |
|-------------------------------------|-----------------------------------------------------------------------------------------------------------------------------------------------------------------------------------------------------------------------------------------------------------------------------------------------------------------------------------------------------------------------------------------------------------------------------------------------------------------------------------------------------------------------------------------------------------------------------------------------------------------------------------------------------------------------------------------------------------------------|-----------------------------------------------------------------------------------------------------------------------------------------------------------------------------------------------------------------------------------------------------------------------------------------------------------------------------------------------------------------------------------------------------------------------------------------------------------------------------------------------------------------------------------------------------------------------------------------------------------------------------------------------|
| <b>Prior activity questionnaire</b> | <ul style="list-style-type: none"> <li>- Which activities did you pursue yesterday?</li> <li>- How stressed did you feel yesterday?</li> <li>- Did you have breakfast, lunch, dinner yesterday? If yes, how big was your breakfast, lunch and dinner?</li> <li>- Did you have snacks in-between yesterday? If yes, how big were your snacks?</li> <li>- Did you eat anything after 10pm yesterday?</li> <li>- Did you do sports yesterday?</li> <li>- Did you drink alcohol yesterday?</li> <li>- How did you reach the testing site today (public transport, bike, car, walking)?</li> </ul>                                                                                                                         | <ul style="list-style-type: none"> <li>- Did you have dinner yesterday? If yes, how big was your dinner?</li> <li>- Did you eat anything after dinner? If yes, how big was this meal?</li> <li>- Did you eat anything after midnight? If yes, how big was this meal?</li> <li>- Did you do sports yesterday?</li> <li>- Did you drink alcohol yesterday?</li> <li>- Was reaching the testing site physically exhausting for you?</li> </ul>                                                                                                                                                                                                   |
| <b>Buffet questionnaire</b>         | <p><b>Measurement day 2 only</b></p> <p>For the buffet rating it was asked for:</p> <ul style="list-style-type: none"> <li>- liking of the buffet</li> <li>- liking of the food</li> <li>- liking of the drinks</li> <li>- sufficient choice of different food items</li> <li>- food and drinks which were liked most</li> <li>- food and drinks which were disliked most</li> </ul> <p>To indicate reasons for food intake, participants noted down the time point of food intake of both testing days and could choose from a list of answers for each time point. Possible answers included:</p> <ul style="list-style-type: none"> <li>- Feeling hungry</li> <li>- Feeling appetite</li> <li>- Boredom</li> </ul> | <p><b>Measurement day 1</b></p> <ul style="list-style-type: none"> <li>- Do you think you received UMP or placebo today?</li> <li>- What are your plans for tonight?</li> <li>- What did you do today during the testing period?</li> </ul> <p><b>Measurement day 2</b></p> <ul style="list-style-type: none"> <li>- Do you think you received UMP or placebo today?</li> <li>- What are your plans for tonight?</li> <li>- What did you do today during the testing period?</li> <li>- Did you notice/assume that we are measuring your food intake?</li> <li>- Do you think your evening plans on the first testing day affected</li> </ul> |

|  |                                                                                                                                                                                                                                                                    |                                                                                                                                                                                                                          |
|--|--------------------------------------------------------------------------------------------------------------------------------------------------------------------------------------------------------------------------------------------------------------------|--------------------------------------------------------------------------------------------------------------------------------------------------------------------------------------------------------------------------|
|  | <ul style="list-style-type: none"> <li>- Urge to eat or habit of eating</li> <li>- Incentive values of the buffet</li> <li>- Emotional reasons for eating</li> <li>- Eating as reward</li> <li>- Further reasons, which the participant could note down</li> </ul> | <ul style="list-style-type: none"> <li>- your food intake on the first testing day?</li> <li>- Do you think your evening plans on the second testing day affected your food intake on the second testing day?</li> </ul> |
|--|--------------------------------------------------------------------------------------------------------------------------------------------------------------------------------------------------------------------------------------------------------------------|--------------------------------------------------------------------------------------------------------------------------------------------------------------------------------------------------------------------------|

**Table S2: Composition of the buffet (Study 1g)**

Related to STAR Methods Methods details

| Product number | Product name               | Energy (kcal) | Fat (g) | Carbo-hydrates (g) | Sugar (g) | Protein (g) |
|----------------|----------------------------|---------------|---------|--------------------|-----------|-------------|
| 1              | Mayonnaise                 | 713.0         | 78.0    | 2.2                | 2.1       | 1.0         |
| 2              | Butter                     | 745.0         | 82.0    | 1.0                | 1.0       | 0.6         |
| 3              | Cream cheese               | 235.0         | 21.5    | 4.0                | 4.0       | 5.5         |
| 4              | Boiled egg                 | 153.4         | 11.0    | 0.6                | 0.5       | 13.0        |
| 5              | Harz cheese                | 116.0         | 0.3     | 0.3                | 0.1       | 28.0        |
| 6              | Turkey breast slices       | 110.0         | 2.0     | 1.0                | 1.0       | 22.0        |
| 7              | Dates                      | 360.0         | 3.9     | 68.8               | 2.2       | 9.8         |
| 8              | Tomato ketchup             | 102.0         | 0.1     | 23.2               | 22.8      | 1.2         |
| 9              | Jelly bears (packed)       | 343.0         | 0.5     | 77.0               | 46.0      | 6.9         |
| 10             | Jelly bears                | 343.0         | 0.5     | 77.0               | 46.0      | 6.9         |
| 11             | Liquorice wheel            | 317.0         | 0.7     | 74.0               | 47.0      | 3.0         |
| 12             | Bread                      | 254.0         | 3.7     | 45.0               | 3.9       | 8.5         |
| 13             | Jam                        | 245.0         | 0.2     | 58.0               | 54.0      | 0.5         |
| 14             | Fitness bread              | 194.0         | 3.3     | 31.7               | 1.6       | 5.2         |
| 15             | Pumpernickel               | 194.0         | 1.6     | 35.8               | 2.4       | 5.1         |
| 16             | Rice cake                  | 384.0         | 3.2     | 79.0               | 0.7       | 8.3         |
| 17             | Fruchtzwerge               | 105.0         | 2.9     | 13.0               | 12.8      | 6.6         |
| 18             | Rice pudding with cinnamon | 109.0         | 2.4     | 18.5               | 12.7      | 3.2         |
| 19             | Geramont cheese            | 356.0         | 32.0    | 0.5                | 0.5       | 17.0        |
| 20             | Babybell cheese            | 302.0         | 24.0    | 0.1                | 0.1       | 21.5        |

| <b>Product number</b> | <b>Product name</b>                          | <b>Energy (kcal)</b> | <b>Fat (g)</b> | <b>Carbo-hydrates (g)</b> | <b>Sugar (g)</b> | <b>Protein (g)</b> |
|-----------------------|----------------------------------------------|----------------------|----------------|---------------------------|------------------|--------------------|
| 21                    | Smoked salmon                                | 180.0                | 11.0           | 0.5                       | 0.5              | 21.0               |
| 22                    | Chicken meatballs                            | 227.0                | 14.4           | 8.6                       | 0.9              | 15.8               |
| 23                    | Pâté                                         | 378.0                | 36.0           | 1.5                       | 1.0              | 12.0               |
| 24                    | Stickado Salami                              | 522.0                | 44.2           | 2.0                       | 1.0              | 29.0               |
| 25                    | Peanuts                                      | 622.0                | 50.0           | 14.0                      | 5.4              | 25.0               |
| 26                    | Chocolate pudding                            | 157.0                | 8.2            | 17.0                      | 14.0             | 3.3                |
| 27                    | Bread roll with chocolate                    | 416.0                | 22.0           | 46.0                      | 13.0             | 7.0                |
| 28                    | Cake                                         | 435.0                | 20.0           | 57.0                      | 32.0             | 5.3                |
| 29                    | Crisps                                       | 528.0                | 33.0           | 49.0                      | 0.6              | 5.6                |
| 30                    | Kinder Schokolade (chocolate)                | 566.0                | 35.0           | 53.5                      | 53.3             | 8.7                |
| 31                    | Hanuta mini (waffle with chocolate and nuts) | 542.0                | 31.9           | 54.0                      | 42.6             | 7.6                |
| 32                    | Raffaello                                    | 628.0                | 48.6           | 38.3                      | 33.8             | 7.5                |
| 33                    | Nutella                                      | 547.0                | 31.8           | 56.9                      | 55.9             | 6.6                |
| 34                    | Mars mini                                    | 443.0                | 15.7           | 70.9                      | 61.9             | 3.9                |
| 35                    | Corny Milch classic (cereal bar)             | 444.0                | 19.1           | 59.3                      | 29.2             | 5.8                |
| 36                    | Milchschnitte                                | 422.0                | 27.9           | 34.0                      | 29.5             | 8.0                |
| 37                    | Sandwich (Crispbread with cheese)            | 470.0                | 23.0           | 53.0                      | 3.0              | 9.0                |
| 38                    | Muesli with chocolate                        | 406.0                | 11.3           | 60.7                      | 22.2             | 10.7               |
| 39                    | M&Ms                                         | 511.0                | 25.3           | 59.1                      | 53.6             | 9.8                |
| 40                    | Carazza                                      | 377.0                | 22.0           | 33.0                      | 9.1              | 11.0               |
| 41                    | Sandwich                                     | 264.0                | 12.0           | 28.0                      | 1.5              | 9.3                |
| 42                    | Cucumber                                     | 12.0                 | 0.1            | 1.7                       | 1.7              | 0.6                |

| Product number | Product name                        | Energy (kcal) | Fat (g) | Carbo-hydrates (g) | Sugar (g) | Protein (g) |
|----------------|-------------------------------------|---------------|---------|--------------------|-----------|-------------|
| 43             | Small tomatoes                      | 18.0          | 0.2     | 3.9                | 2.6       | 0.9         |
| 44             | Yoghurt, 1,5 % fat, 150 g           | 52.0          | 1.5     | 5.3                | 5.3       | 4.2         |
| 45             | Apple Braeburn                      | 50.0          | 0.2     | 11.6               | 11.0      | 0.0         |
| 46             | Banana Chiquita                     | 90.0          | 0.2     | 20.0               | 12.2      | 1.2         |
| 47             | Green grapes                        | 68.0          | 0.3     | 15.6               | 15.4      | 0.7         |
| 48             | Cocoa, 200 ml                       | 72.0          | 2.0     | 9.8                | 9.7       | 3.6         |
| 49             | Gouda cheese in cubes               | 378.0         | 31.0    | 0.0                | 0.0       | 24.0        |
| 50             | Fanta, 1 l                          | 38.0          | 0.0     | 9.2                | 9.1       | 0.0         |
| 51             | Smoothie Pineapple & Banana, 250 ml | 65.0          | 0.7     | 13.0               | 12.0      | 0.6         |
| 52             | Orange juice, 1 l                   | 43.0          | 0.5     | 8.8                | 8.8       | 1.0         |
| 53             | Milk, 1,5 %, 1 l                    | 66.0          | 3.6     | 4.9                | 4.9       | 3.4         |
| 54             | Apple juice, 1 l                    | 44.0          | 0.5     | 10.4               | 9.9       | 1.0         |
| 55             | Water                               |               |         |                    |           |             |

**Table S3: Content of the standardized breakfast (Study 0.5 g)**  
Related to STAR Methods Methods details

|   | Food item                                         | Amount             | kcal       |
|---|---------------------------------------------------|--------------------|------------|
| 1 | Bread roll                                        | 1                  | 176        |
| 2 | Cheese (Gouda Holland, 48% Fett in Tr. Mittelalt) | 1 slice (37 g)     | 146        |
| 3 | Small tomatoes                                    | 3                  | 10         |
| 4 | Butter (Meggle)                                   | 8 g                | 62         |
| 5 | Yoghurt (Almighurt)                               | 1 x 125 g          | 143        |
| 6 | Jam (Zentis)                                      | 1 x 25 g           | 61         |
| 7 | Orange juice (Rewe Beste Wahl)                    | 1 glass (200 ml)   | 88         |
|   |                                                   | <b>Total kcal:</b> | <b>686</b> |

**Table S4: Composition of the buffet (Study 0.5 g)**  
Related to STAR Methods Methods details

|   | <b>Food item</b>                                             | <b>Amount</b> | <b>kcal/100g</b> |
|---|--------------------------------------------------------------|---------------|------------------|
| 1 | Vegetarian ravioli<br>(Ravioli, Maggi, Gemüse)               | 1600 g        | 82               |
| 2 | Ravioli with meat filling (Ravioli, Maggi, in pikanter Soße) | 1600 g        | 87               |
| 3 | Rice pudding<br>(Milchreis, Milram)                          | 1 kg          | 107              |
| 4 | Sour cherries<br>(Schattenmorellen, Rewe Beste Wahl)         | 740 g         | 74               |
| 5 | Sugar (ja! Raffinade-Zucker)                                 | 50 g          | 400              |
| 6 | Cinnamon (Zimt, Ostman)                                      | 1 g           | 243              |

## Statistical analyses and results

### Circulating uridine promotes food intake by dynamically stimulating hunger

**Table S5: Effect of uridine on hunger [1 g, placebo]**

Related to Figure 2B

hunger ~ uridine + uridine:timepoint + (1|ID)

| <i>regressor</i>  | <i>numDF</i> | <i>denDF</i> | <i>F</i> | <i>p-value</i> | $\omega^2$ |     |
|-------------------|--------------|--------------|----------|----------------|------------|-----|
| uridine           | 1            | 44.71        | 29.04    | <0.001         | 0.38       | *** |
| uridine:timepoint | 2            | 55.62        | 5.76     | .005           | 0.14       | **  |

$\omega^2$  = partial omega squared

**Table S6: Effect of uridine on food intake [1 g, placebo]**

Related to Figure 2F

intake\_kcal ~ uridine + uridine:timepoint + (1|ID)

| <i>regressor</i>  | <i>numDF</i> | <i>denDF</i> | <i>F</i> | <i>p-value</i> | $\omega^2$ |    |
|-------------------|--------------|--------------|----------|----------------|------------|----|
| uridine           | 1            | 46.22        | 8.46     | 0.006          | 0.13       | ** |
| uridine:timepoint | 2            | 57.23        | 1.88     | 0.161          | 0.03       |    |

**Table S7: mediation analysis uridine → hunger → food intake [1 g, placebo]**

Related to Figure 2G

Model mediator: *hunger* ~ *uridine* + (1|ID)

Model full: *food\_intake* ~ *uridine* + *hunger* + (1|ID)

|                | <i>Estimate</i> | <i>95% CI lower</i> | <i>95% CI upper</i> | <i>p-value</i> |     |
|----------------|-----------------|---------------------|---------------------|----------------|-----|
| ACME           | 50.9            | 16.0                | 92.2                | 0.002          | **  |
| ADE            | 36.6            | -19.2               | 93.2                | 0.199          |     |
| Total          | 87.5            | 38.8                | 136.7               | <0.001         | *** |
| Prop. Mediated | 0.58            | 0.17                | 1.39                | 0.002          | **  |

Note. ACME = average causal mediation effects, ADE = average direct effects, Total = total effect of uridine and hunger on food intake, Prop. Mediated = proportion mediated, CI = confidence interval

**Table S8: Effect of hunger on food intake [1 g, placebo]**  
Related to Figure 2E

$intake\_kcal \sim hunger + hunger:timepoint$

| <i>regressor</i> | <i>numDF</i> | <i>denDF</i> | <i>F</i> | <i>p-value</i> | $\omega^2$ |     |
|------------------|--------------|--------------|----------|----------------|------------|-----|
| hunger           | 1            | 55.59        | 25.73    | <0.001         | 0.30       | *** |
| hunger:timepoint | 2            | 55.07        | 5.48     | 0.007          | 0.13       | **  |

**Table S9: Effect of uridine on satiety [1 g, placebo]**  
Related to Figure 2

$satiety \sim uridine + uridine:timepoint + (1|ID)$

| <i>regressor</i>  | <i>numDF</i> | <i>denDF</i> | <i>F</i> | <i>p-value</i> | $\omega^2$ |     |
|-------------------|--------------|--------------|----------|----------------|------------|-----|
| uridine           | 1            | 44.89        | 31.45    | <0.001         | 0.39       | *** |
| uridine:timepoint | 2            | 55.75        | 7.35     | .001           | .018       | *** |

**Table S10: Effect of uridine on appetite [1 g, placebo]**  
Related to Figure 2

$appetite \sim uridine + uridine:timepoint + (1|ID)$

| <i>regressor</i>  | <i>numDF</i> | <i>denDF</i> | <i>F</i> | <i>p-value</i> | $\omega^2$ |     |
|-------------------|--------------|--------------|----------|----------------|------------|-----|
| uridine           | 1            | 48.43        | 22.93    | <0.001         | 0.30       | *** |
| uridine:timepoint | 2            | 51.51        | 2.83     | .068           | 0.06       | +   |

**Table S10a: Effect of basal uridine on total intake [1 g, placebo]**  
Related to Figure 2

$intake_{totalkcal} \sim uridine@t0 + sports$

| <i>regressor</i> | <i>numDF</i> | <i>denDF</i> | <i>F</i> | <i>p-value</i> | $\omega^2$ |  |
|------------------|--------------|--------------|----------|----------------|------------|--|
| uridine@t0       | 1            | 19           | 1.28     | 0.273          | 0.01       |  |
| sports           | 1            | 19           | 1.58     | 0.224          | 0.03       |  |

Note. uridine@t0 = baseline fasted uridine levels; sports = if participants did sports the day prior to the testing day



**Table S10b: Effect of basal uridine on total intake [0.5 g, placebo]**  
Related to Figure 2

$$intake_{total_{kcal}} \sim uridine@t0 + sports + dinner\_size$$

| <i>regressor</i> | <i>numDF</i> | <i>denDF</i> | <i>F</i> | <i>p-value</i> | $\omega^2$ |   |
|------------------|--------------|--------------|----------|----------------|------------|---|
| uridine@t0       | 1            | 13           | 0.001    | 0.979          | -0.06      |   |
| sports           | 1            | 13           | 1.637    | 0.223          | 0.04       |   |
| dinner_size      | 1            | 13           | 3.443    | 0.086          | 0.13       | + |

Note. uridine@t0 = baseline fasted uridine levels; sports = if participants did sports the day prior to the testing day; dinner\_size = size of the dinner the evening prior to the testing day

**Table S10c: Effect of body composition on basal uridine [1 g]**  
Related to Figure 2

$$uridine@t0 \sim fatfree\_mass_{kg} + fat\_mass\% + (1|ID)$$

| <i>regressor</i> | <i>numDF</i> | <i>denDF</i> | <i>F</i> | <i>p-value</i> | $\omega^2$ |  |
|------------------|--------------|--------------|----------|----------------|------------|--|
| Fatfree_mass_kg  | 1            | 16.292       | 2.315    | 0.147          | 0.07       |  |
| Fat_mass_%       | 1            | 16.292       | 0.730    | 0.405          | -0.01      |  |

**Table S10d: Effect of body composition on basal uridine [0.5 g]**  
Related to Figure 2

$$uridine@t0 \sim fatfree\_mass_{kg} + fat\_mass\% + (1|ID)$$

| <i>regressor</i> | <i>numDF</i> | <i>denDF</i> | <i>F</i> | <i>p-value</i> | $\omega^2$ |  |
|------------------|--------------|--------------|----------|----------------|------------|--|
| Fatfree_mass_kg  | 1            | 11.351       | 0.380    | 0.550          | -0.05      |  |
| Fat_mass_%       | 1            | 11.351       | 0.105    | 0.752          | -0.07      |  |

### Food intake downregulates serum uridine and hunger

**Table S11: Effect of caloric intake on hunger [1 g, placebo]**  
Related to Figure 2I

$$\Delta hunger \sim ingested\_calories + ingested\_calories:timepoint + (1|ID)$$

| <i>regressor</i>            | <i>numDF</i> | <i>denDF</i> | <i>F</i> | <i>p-value</i> | $\omega^2$ |     |
|-----------------------------|--------------|--------------|----------|----------------|------------|-----|
| ingested_calories           | 1            | 59.97        | 54.35    | <0.001         | 0.46       | *** |
| Ingested_calories:timepoint | 2            | 59.95        | 8.79     | <0.001         | 0.20       | *** |

**Table S12: Effect of caloric intake on uridine levels [1 g, placebo]**

Related to Figure 2H

$$\Delta\text{uridine} \sim \text{ingested\_calories} + \text{ingested\_calories:timepoint} + \text{sports} + (1|ID)$$

| <i>regressor</i>            | <i>numDF</i> | <i>denDF</i> | <i>F</i> | <i>p-value</i> | $\omega^2$ |     |
|-----------------------------|--------------|--------------|----------|----------------|------------|-----|
| ingested_calories           | 1            | 37.73        | 19.29    | <0.001         | 0.32       | *** |
| ingested_calories:timepoint | 1            | 35.85        | 16.24    | <0.001         | 0.13       | *** |
| sports                      | 1            | 18.23        | 4.10     | 0.058          | 0.29       | +   |

**Table S13: Effect of uridine change on hunger change [1 g, placebo]**

Related to Figure 2I

$$\Delta\text{hunger} \sim \Delta\text{uridine} + \Delta\text{uridine:timepoint} + (1|ID)$$

| <i>regressor</i>                 | <i>numDF</i> | <i>denDF</i> | <i>F</i> | <i>p-value</i> | $\omega^2$ |     |
|----------------------------------|--------------|--------------|----------|----------------|------------|-----|
| $\Delta\text{uridine}$           | 1            | 36.39        | 18.36    | <0.001         | 0.31       | *** |
| $\Delta\text{uridine:timepoint}$ | 1            | 34.43        | 10.02    | 0.003          | 0.20       | **  |

**Table S14: mediation analysis ingested calories → uridine drop → hunger change [1 g, placebo]**

Related to Figure 2K

$$\text{Model mediator: } \Delta\text{uridine} \sim \text{ingested\_calories} + (1|ID)$$

$$\text{Model full: } \Delta\text{hunger} \sim \Delta\text{uridine} + \text{ingested\_calories} + (1|ID)$$

|                | <i>Estimate</i> | <i>95% CI lower</i> | <i>95% CI upper</i> | <i>p-value</i> |     |
|----------------|-----------------|---------------------|---------------------|----------------|-----|
| ACME           | -.0002          | -.00008             | 0                   | .034           | *   |
| ADE            | -.0004          | -.0006              | 0                   | <0.001         | *** |
| Total          | -.0005          | -.0007              | 0                   | <0.001         | *** |
| Prop. Mediated | 0.17            | .001                | 0.41                | 0.034          | *   |

Note. ACME = average causal mediation effects, ADE = average direct effects, Total = total effect of uridine and hunger on food intake, Prop. Mediated = proportion mediated, CI = confidence interval

**Table S15: Effect of uridine change on satiety change [1 g, placebo]**  
 Related to Figure 2

$$\Delta \text{satiety} \sim \Delta \text{uridine} + \Delta \text{uridine:timepoint} + (1|ID)$$

| <i>regressor</i>         | <i>numDF</i> | <i>denDF</i> | <i>F</i> | <i>p-value</i> | $\omega^2$ |     |
|--------------------------|--------------|--------------|----------|----------------|------------|-----|
| <i>Uridine</i>           | 1            | 38,95        | 28,28    | <0.001         | 0.40       | *** |
| <i>Uridine:timepoint</i> | 1            | 36,95        | 9.99     | 0.003          | 0.19       | **  |

**Table S16: Effect of uridine change on appetite change [1 g, placebo]**  
 Related to Figure 2

$$\Delta \text{appetite} \sim \Delta \text{uridine} + \Delta \text{uridine:timepoint} + (1|ID)$$

| <i>regressor</i>         | <i>numDF</i> | <i>denDF</i> | <i>F</i> | <i>p-value</i> | $\omega^2$ |     |
|--------------------------|--------------|--------------|----------|----------------|------------|-----|
| <i>Uridine</i>           | 1            | 40.96        | 13.09    | <0.001         | 0.22       | *** |
| <i>Uridine:timepoint</i> | 1            | 40.47        | 5.67     | 0.022          | 0.10       | *   |

### Oral UMP increases circulating uridine, potentiates hunger and food intake

**Table S17: Effect of 0.5 g oral UMP supplementation on uridine levels [0.5 g]**  
 Related to Figure 3A

0.5g of oral UMP were administered and blood uridine levels were measured at baseline, after 2 hours and after 3.5hours.

$$\text{uridine} \sim \text{intervention} * \text{timepoint} + \text{intervention} \\
: (\text{fatfree\_mass}_{kg} + \text{fat\_mass}_{kg} + \text{sex}) + (1|ID)$$

|                              | <i>numDF</i> | <i>denDF</i> | <i>F-value</i> | <i>p-value</i> | $\omega^2$ |     |
|------------------------------|--------------|--------------|----------------|----------------|------------|-----|
| intervention                 | 1            | 78.04        | 0.519          | 0.473          | -6.04e-03  |     |
| timepoint                    | 2            | 78.04        | 39.77          | <0.001         | 0.49       | *** |
| intervention:timepoint       | 2            | 78.04        | 13.48          | <0.001         | 0.24       | *** |
| intervention:fatfree_mass_kg | 2            | 17.24        | 0.72           | 0.499          | -0.03      |     |
| intervention:fat_mass_kg     | 2            | 17.24        | 0.70           | 0.510          | -0.03      |     |
| intervention:gender          | 2            | 17.24        | 1.45           | 0.261          | 0.04       |     |

**Table S18: Effect of UMP supplementation on uridine levels, post-hoc [0.5 g]**  
Related to Figure 3A

The posthoc-test revealed that uridine concentrations are significantly higher under 0.5 g UMP treatment after 2 and 3.5 hours.

|                   | <i>Estimate</i> | <i>Std. error</i> | <i>t</i> | <i>p-value</i> |     |
|-------------------|-----------------|-------------------|----------|----------------|-----|
| U@t0 – P@t0       | 0.117           | 0.26              | 0.444    | 0.658          |     |
| U@t+2 – P@t+2     | 2.036           | 0.26              | 7.760    | <0.001         | *** |
| U@t+3.5 – P@t+3.5 | 1.113           | 0.26              | 4.237    | <0.001         | *** |

Note. Std. error = Standard error, P= placebo U = treatment with UMP, @t0 = initial timepoint, @t+2 = after 2 hours, @t+3.5 = after 3.5 hours.

**Table S19: Effect of UMP supplementation on hunger ratings [0.5 g]**  
Related to Figure 3C-D

Initial hunger ratings were subtracted from the average hunger ratings during the buffet.

$$hunger@buffet - hunger@t0 \sim intervention * fatfree\_mass_{kg} + sport + alcohol + (1|ID)$$

|                              | <i>numDF</i> | <i>denDF</i> | <i>F-value</i> | <i>p-value</i> | $\omega^2$ |   |
|------------------------------|--------------|--------------|----------------|----------------|------------|---|
| intervention                 | 1            | 14.96        | 5.21           | 0.038          | 0.20       | * |
| intervention:fatfree_mass_kg | 1            | 15.19        | 5.44           | 0.034          | -0.03      | * |
| fatfree_mass_kg              | 1            | 12.48        | 0.58           | 0.459          | 0.02       |   |
| sport                        | 1            | 25.13        | 1.65           | 0.211          | 0.18       |   |
| alcohol                      | 1            | 21.21        | 6.18           | 0.021          | 0.21       | * |

Note. sport = if the participant did sports the day prior to the testing day, alcohol = if the participant drank alcohol the day prior to the testing day

**Table S20: Effect of UMP supplementation on caloric intake [0.5 g]**  
Related to Figure 3E-F

$$intake_{kcal} \sim intervention * fatfree\_mass_{kg} + fatmass_{kg} + dinner\_size + sport + evening\_food + (1|ID)$$

|                              | <i>numDF</i> | <i>denDF</i> | <i>F-value</i> | <i>p-value</i> | $\omega^2$ |     |
|------------------------------|--------------|--------------|----------------|----------------|------------|-----|
| intervention                 | 1            | 16.22        | 4.04           | 0.061          | 0.14       | +   |
| intervention:fatfree_mass_kg | 1            | 15.94        | 5.53           | 0.032          | 0.68       | *   |
| Fatfree mass_kg              | 1            | 13.17        | 32.94          | <0.001         | 0.38       | *** |
| fatmass_kg                   | 1            | 13.62        | 10.75          | 0.006          | 0.19       | **  |
| dinner_size                  | 1            | 25.89        | 7.71           | 0.010          | 0.22       | *   |
| sport                        | 1            | 25.19        | 8.62           | 0.007          | 0.17       | **  |

|              |   |       |      |       |      |   |
|--------------|---|-------|------|-------|------|---|
| evening_food | 1 | 25.51 | 6.55 | 0.017 | 0.20 | * |
|--------------|---|-------|------|-------|------|---|

Note. Dinner\_size = size of the dinner the evening prior to the testing day, sport = if the participant did sports the day prior to the testing day, evening\_food = if the participant had food after dinner the evening prior to the testing day

### A single-dose of oral UMP does not alter markers of the post-ingestive metabolic response

**Table S21: Effect of adiposity on fasting HOMA-IR [0.5g]**

Related to Figure 4A

$$HOMA-IR \sim intervention * fatmass\_pc + (1|subjectID)$$

|                          | numDF | denDF | F-value | p-value | $\omega^2$ |   |
|--------------------------|-------|-------|---------|---------|------------|---|
| intervention             | 1     | 15    | 4.69    | 0.047   | 0.18       | * |
| fat_mass_pc              | 1     | 15    | 0.01    | 0.964   | -0.06      |   |
| intervention:fat_mass_pc | 1     | 15    | 1.58    | 0.228   | 0.03       |   |

**Table S22: Effect of UMP intervention on serum insulin levels [0.5g]**

Related to Figure 4B

$$Insulin \sim intervention * timepoint + (1|ID)$$

|                        | numDF | denDF | F-value | p-value | $\omega^2$ |     |
|------------------------|-------|-------|---------|---------|------------|-----|
| timepoint              | 2     | 80    | 42.0    | <0.001  | 0.5        | *** |
| intervention           | 1     | 80    | 0.09    | 0.753   | -0.01      |     |
| intervention:timepoint | 2     | 80    | 0.46    | 0.633   | -0.01      |     |
| t-contrast             |       |       |         |         |            |     |
|                        |       |       | t-value | p-value |            |     |
| Timepoint 0h vs. 2h    |       |       | -8.65   | <0.001  |            | *** |
| Timepoint 0h vs. 3.5h  |       |       | -1.69   | 0.256   |            |     |
| Timepoint 2h vs. 3.5h  |       |       | 6.96    | <0.001  |            | *** |

**Table S23: Effect of UMP intervention on serum glucose levels [0.5g]**

Related to Figure 4D

$$Glucose \sim intervention * timepoint + (1|ID)$$

|                        | numDF | denDF | F-value | p-value | $\omega^2$ |     |
|------------------------|-------|-------|---------|---------|------------|-----|
| timepoint              | 2     | 80    | 12.5    | <0.001  | 0.22       | *** |
| intervention           | 1     | 80    | 1.1241  | 0.292   | <0.01      |     |
| intervention:timepoint | 2     | 80    | 1.8129  | 0.170   | 0.02       |     |
| t-contrast             |       |       |         |         |            |     |
|                        |       |       | t-value | p-value |            |     |

|                       |  |  |       |        |  |     |
|-----------------------|--|--|-------|--------|--|-----|
| Timepoint 0h vs. 2h   |  |  | 4.91  | <0.001 |  | *** |
| Timepoint 0h vs. 3.5h |  |  | 1.64  | 0.281  |  |     |
| Timepoint 2h vs. 3.5h |  |  | -3.27 | 0.005  |  | **  |

**Table S24: Effect of adiposity on (log-) fasting leptin [0.5g]**

Related to Figure 4D

$$\log(\text{leptin}) \sim \text{intervention} * \text{fatmass\_pc} + (1|\text{subjectID})$$

|                          | <i>numDF</i> | <i>denDF</i> | <i>F-value</i> | <i>p-value</i> | $\omega^2$ |     |
|--------------------------|--------------|--------------|----------------|----------------|------------|-----|
| fat_mass_pc              | 1            | 15           | 127.77         | <0.001         | 0.88       | *** |
| intervention             | 1            | 15           | 1.16           | 0.298          | <0.01      |     |
| intervention:fat_mass_pc | 1            | 15           | 0.94           | 0.348          | <0.01      |     |

**Table S25: Effect of (log-) fasting leptin on total food intake [0.5g]**

Related to Figure 4E

$$\text{total intake}_{kcal} \sim \text{intervention} * \log(\text{leptin}) + (1|\text{subjectID})$$

|                           | <i>numDF</i> | <i>denDF</i> | <i>F-value</i> | <i>p-value</i> | $\omega^2$ |     |
|---------------------------|--------------|--------------|----------------|----------------|------------|-----|
| log(leptin)               | 1            | 16.9         | 25.65          | <0.001         | 0.58       | *** |
| intervention              | 1            | 14.9         | 0.04           | 0.848          | -0.06      |     |
| intervention: log(leptin) | 1            | 15.1         | 0.87           | 0.366          | <0.01      |     |

**Table S26: Effect of UMP intervention on (log-) serum leptin levels [0.5g]**

Related to Figure 4F

$$\log(\text{leptin}) \sim \text{intervention} * \text{timepoint} + (1|ID)$$

|                        | <i>numDF</i> | <i>denDF</i> | <i>F-value</i> | <i>p-value</i> | $\omega^2$ |    |
|------------------------|--------------|--------------|----------------|----------------|------------|----|
| timepoint              | 2            | 80           | 5.70           | 0.005          | 0.10       | ** |
| intervention           | 1            | 80           | 0.58           | 0.447          | <0.001     |    |
| intervention:timepoint | 2            | 80           | 1.53           | 0.590          | -0.01      |    |
| t-contrast             |              |              |                |                |            |    |
|                        |              |              | <i>t-value</i> | <i>p-value</i> |            |    |
| Timepoint 0h vs. 2h    |              |              | 3.36           | 0.004          |            | ** |
| Timepoint 0h vs. 3.5h  |              |              | 1.97           | 0.150          |            |    |
| Timepoint 2h vs. 3.5h  |              |              | -1.40          | 0.420          |            |    |

**Table S27: Effect of UMP intervention on serum amino acids levels [0.5g]**  
 Related to Figure 4G

$$\text{amino acid} \sim \text{intervention} * \text{timepoint} + (1|ID)$$

|                        | <i>numDF</i> | <i>denDF</i> | <i>F-value</i> | <i>p-value</i> | <i>Bonferroni corrected p-value</i> | <sup>2</sup> |     |
|------------------------|--------------|--------------|----------------|----------------|-------------------------------------|--------------|-----|
| <b>Alanine</b>         |              |              |                |                |                                     |              |     |
| timepoint              | 2            | 2.89E+07     | 7.62           | <0.001         | 0.010                               | <0.001       | *   |
| intervention           | 1            | 3.48E+07     | 1.88           | 0.170          | 3.399                               | <0.001       |     |
| intervention:timepoint | 2            | 2.89E+07     | 2.00           | 0.136          | 2.715                               | <0.001       |     |
| t-contrast             |              |              |                |                |                                     |              |     |
|                        |              |              | <i>t-value</i> | <i>p-value</i> |                                     |              |     |
| Timepoint 0h vs. 2h    |              |              | -3.87          | <0.001         |                                     |              | *** |
| Timepoint 0h vs. 3.5h  |              |              | 2.44           | 0.044          |                                     |              | *   |
| <b>Arginine</b>        |              |              |                |                |                                     |              |     |
| timepoint              | 2            | 3.69E+07     | 2.23           | 0.107          | 2.144                               | <0.001       |     |
| intervention           | 1            | 4.45E+07     | 3.30           | 0.069          | 1.387                               | <0.001       |     |
| intervention:timepoint | 2            | 3.69E+07     | 1.63           | 0.196          | 3.920                               | <0.001       |     |
| <b>Asparagine</b>      |              |              |                |                |                                     |              |     |
| timepoint              | 2            | 1.25E+07     | 6.87           | 0.001          | 0.021                               | <0.001       | *   |
| intervention           | 1            | 1.51E+07     | 3.02           | 0.082          | 1.647                               | <0.001       |     |
| intervention:timepoint | 2            | 1.25E+07     | 0.88           | 0.417          | 8.332                               | <0.001       |     |
| t-contrast             |              |              |                |                |                                     |              |     |
|                        |              |              | <i>t-value</i> | <i>p-value</i> |                                     |              |     |
| Timepoint 0h vs. 2h    |              |              | -3.59          | 0.001          |                                     |              | **  |
| Timepoint 0h vs. 3.5h  |              |              | 2.63           | 0.025          |                                     |              | *   |
| <b>Aspartic Acid</b>   |              |              |                |                |                                     |              |     |
| timepoint              | 2            | 78.997       | 2.04           | 0.136          | 2.723                               | 0.02         |     |
| intervention           | 1            | 79           | 0.64           | 0.427          | 8.545                               | -4.50E-03    |     |
| intervention:timepoint | 2            | 78.997       | 0.70           | 0.498          | 9.962                               | -7.29E-03    |     |
| <b>Cysteine</b>        |              |              |                |                |                                     |              |     |
| timepoint              | 2            | 79.109       | 0.85           | 0.430          | 8.610                               | -3.62E-03    |     |
| intervention           | 1            | 79.109       | 3.01           | 0.087          | 1.734                               | 0.02         |     |
| intervention:timepoint | 2            | 79.109       | 0.48           | 0.621          | 12.419                              | -0.01        |     |
| <b>Glutamic Acid</b>   |              |              |                |                |                                     |              |     |
| timepoint              | 2            | 1.72E+08     | 0.01           | 0.990          | 19.789                              | <0.001       |     |
| intervention           | 1            | 2.07E+08     | 0.48           | 0.487          | 9.745                               | <0.001       |     |
| intervention:timepoint | 2            | 1.72E+08     | 0.20           | 0.819          | 16.382                              | <0.001       |     |
| <b>Glutamine</b>       |              |              |                |                |                                     |              |     |
| timepoint              | 2            | 3.28E+07     | 1.95           | 0.142          | 2.841                               | <0.001       |     |
| intervention           | 1            | 3.95E+07     | 3.12           | 0.077          | 1.542                               | <0.001       | .   |
| intervention:timepoint | 2            | 3.28E+07     | 0.81           | 0.443          | 8.863                               | <0.001       |     |

| <b>Glycine</b>         |   |          |                |                |        |           |     |
|------------------------|---|----------|----------------|----------------|--------|-----------|-----|
| timepoint              | 2 | 79.131   | 0.60           | 0.549          | 10.975 | -9.72E-03 |     |
| intervention           | 1 | 79.132   | 3.33           | 0.072          | 1.438  | 0.03      |     |
| intervention:timepoint | 2 | 79.131   | 1.11           | 0.335          | 6.703  | 2.63E-03  |     |
| <b>Histidine</b>       |   |          |                |                |        |           |     |
| timepoint              | 2 | 2.28E+07 | 2.17           | 0.114          | 2.288  | <0.001    |     |
| intervention           | 1 | 2.74E+07 | 1.73           | 0.187          | 3.756  | <0.001    |     |
| intervention:timepoint | 2 | 2.28E+07 | 1.10           | 0.331          | 6.639  | <0.001    |     |
| <b>Isoleucine</b>      |   |          |                |                |        |           |     |
| timepoint              | 2 | 3.51E+07 | 4.43           | 0.011          | 0.238  | <0.001    |     |
| intervention           | 1 | 4.23E+07 | 1.12           | 0.290          | 5.810  | <0.001    |     |
| intervention:timepoint | 2 | 3.51E+07 | 1.55           | 0.212          | 4.236  | <0.001    |     |
| <b>Leucine</b>         |   |          |                |                |        |           |     |
| timepoint              | 2 | 3.24E+07 | 4.46           | 0.012          | 0.232  | <0.001    |     |
| intervention           | 1 | 3.90E+07 | 1.38           | 0.240          | 4.797  | <0.001    |     |
| intervention:timepoint | 2 | 3.24E+07 | 1.54           | 0.213          | 4.255  | <0.001    |     |
| <b>Lysine</b>          |   |          |                |                |        |           |     |
| timepoint              | 2 | 2.00E+07 | 4.21           | 0.015          | 0.297  | <0.001    |     |
| intervention           | 1 | 2.42E+07 | 0.99           | 0.320          | 6.396  | <0.001    |     |
| intervention:timepoint | 2 | 2.00E+07 | 1.72           | 0.180          | 3.591  | <0.001    |     |
| <b>Methionine</b>      |   |          |                |                |        |           |     |
| timepoint              | 2 | 1.36E+07 | 5.06           | 0.006          | 0.127  | <0.001    |     |
| intervention           | 1 | 1.64E+07 | 4.00           | 0.045          | 0.908  | <0.001    |     |
| intervention:timepoint | 2 | 1.36E+07 | 1.86           | 0.155          | 3.102  | <0.001    |     |
| <b>Phenylalanine</b>   |   |          |                |                |        |           |     |
| timepoint              | 2 | 1.43E+07 | 4.39           | 0.012          | 0.247  | <0.001    |     |
| intervention           | 1 | 1.73E+07 | 2.22           | 0.136          | 2.722  | <0.001    |     |
| intervention:timepoint | 2 | 1.43E+07 | 1.30           | 0.272          | 5.442  | <0.001    |     |
| <b>Proline</b>         |   |          |                |                |        |           |     |
| timepoint              | 2 | 1.62E+07 | 14.09          | <0.001         | <0.001 | <0.001    | *** |
| intervention           | 1 | 1.95E+07 | 4.97           | 0.026          | 0.515  | <0.001    |     |
| intervention:timepoint | 2 | 1.62E+07 | 1.59           | 0.204          | 4.074  | <0.001    |     |
|                        |   |          |                | t-contrast     |        |           |     |
|                        |   |          | <i>t-value</i> | <i>p-value</i> |        |           |     |
| Timepoint 0h vs. 2h    |   |          | -5.25          | <0.001         |        |           |     |
| Timepoint 0h vs. 3.5h  |   |          | -3.28          | 0.003          |        |           |     |
| <b>Serine</b>          |   |          |                |                |        |           |     |
| timepoint              | 2 | 2.20E+07 | 2.27           | 0.103          | 2.068  | <0.001    |     |
| intervention           | 1 | 2.65E+07 | 5.42           | 0.020          | 0.399  | <0.001    |     |
| intervention:timepoint | 2 | 2.20E+07 | 1.11           | 0.328          | 6.569  | <0.001    |     |
| <b>Threonine</b>       |   |          |                |                |        |           |     |
| timepoint              | 2 | 1.69E+07 | 3.11           | 0.044          | 0.887  | <0.001    |     |
| intervention           | 1 | 2.03E+07 | 7.40           | 0.007          | 0.130  | <0.001    |     |
| intervention:timepoint | 2 | 1.69E+07 | 1.08           | 0.341          | 6.822  | <0.001    |     |
| <b>Tryptophane</b>     |   |          |                |                |        |           |     |
| timepoint              | 1 | 1.31E+22 | 0.53           | 0.468          | 4.675  | <0.001    |     |



|                        |   |          |      |       |       |        |  |
|------------------------|---|----------|------|-------|-------|--------|--|
| intervention           | 1 | 1.66E+08 | 0.14 | 0.711 | 3.282 | <0.001 |  |
| intervention:timepoint | 1 | 5.62E+22 | 2.65 | 0.104 | 4.225 | <0.001 |  |
| <b>Tyrosine</b>        |   |          |      |       |       |        |  |
| timepoint              | 2 | 2.04E+07 | 5.36 | 0.005 | 0.094 | <0.001 |  |
| intervention           | 1 | 2.46E+07 | 2.34 | 0.126 | 2.525 | <0.001 |  |
| intervention:timepoint | 2 | 2.04E+07 | 1.49 | 0.225 | 4.509 | <0.001 |  |
| <b>Valine</b>          |   |          |      |       |       |        |  |
| timepoint              | 2 | 3.90E+07 | 2.57 | 0.077 | 1.531 | <0.001 |  |
| intervention           | 1 | 4.70E+07 | 1.90 | 0.168 | 3.354 | <0.001 |  |
| intervention:timepoint | 2 | 3.90E+07 | 1.35 | 0.258 | 5.160 | <0.001 |  |

**Table S28: Effect of adiposity on fasting HOMA-IR [1g]**

Related to Figure 4

$$HOMA-IR \sim intervention * fatmass\_pc + (1|subjectID)$$

|                          | <i>numDF</i> | <i>denDF</i> | <i>F-value</i> | <i>p-value</i> | $\omega^2$ |   |
|--------------------------|--------------|--------------|----------------|----------------|------------|---|
| intervention             | 1            | 17           | 4.91           | 0.041          | 0.17       | * |
| fat_mass_pc              | 1            | 17           | 0.65           | 0.431          | -0.02      |   |
| intervention:fat_mass_pc | 1            | 17           | 2.29           | 0.149          | 0.06       |   |

**Table S29: Effect of UMP intervention on serum insulin levels [1g]**

Related to Figure 4

$$insulin \sim intervention * timepoint + (1|ID)$$

|                        | <i>numDF</i> | <i>denDF</i> | <i>F-value</i> | <i>p-value</i> | $\omega^2$ |     |
|------------------------|--------------|--------------|----------------|----------------|------------|-----|
| timepoint              | 2            | 90           | 32.77          | <0.001         | 0.41       | *   |
| intervention           | 1            | 90           | 1.76           | 0.20           | <0.01      |     |
| intervention:timepoint | 2            | 90           | 1.59           | 0.21           | <0.01      |     |
| t-contrast             |              |              |                |                |            |     |
|                        |              |              | <i>t-value</i> | <i>p-value</i> |            |     |
| Timepoint 0h vs. 2h    |              |              | -7.89          | <0.001         |            | *** |
| Timepoint 0h vs. 4h    |              |              | -5.89          | <0.001         |            | *** |
| Timepoint 2h vs. 4h    |              |              | 2.02           | 0.132          |            |     |

**Table S30: Effect of UMP intervention on serum glucose levels [1g]**

Related to Figure 4

$$Glucose \sim intervention * timepoint + (1|ID)$$

|              | <i>numDF</i> | <i>denDF</i> | <i>F-value</i> | <i>p-value</i> | $\omega^2$ |   |
|--------------|--------------|--------------|----------------|----------------|------------|---|
| timepoint    | 2            | 90           | 3.2800         | 0.042          | 0.05       | * |
| intervention | 1            | 90           | 0.5078         | 0.477          | <0.01      |   |

|                        |            |    |                |                |       |   |
|------------------------|------------|----|----------------|----------------|-------|---|
| intervention:timepoint | 2          | 90 | 0.4461         | 0.64           | -0.01 |   |
|                        | t-contrast |    |                |                |       |   |
|                        |            |    | <i>t-value</i> | <i>p-value</i> |       |   |
| Timepoint 0h vs. 2h    |            |    | 2.16           | 0.096          |       | . |
| Timepoint 0h vs. 4h    |            |    | 2.27           | 0.075          |       | . |
| Timepoint 2h vs. 4h    |            |    | 0.10           | 0.999          |       |   |

**Table S31: Effect of adiposity on (log-) fasting leptin [1g]**  
Related to Figure 4

$$\log(\text{leptin}) \sim \text{intervention} * \text{fatmass\_pc} + (1|\text{subjectID})$$

|                          | <i>numDF</i> | <i>denDF</i> | <i>F-value</i> | <i>p-value</i> | $\omega^2$ |     |
|--------------------------|--------------|--------------|----------------|----------------|------------|-----|
| fat_mass_pc              | 1            | 17           | 62.31          | <0.001         | 0.76       | *** |
| intervention             | 1            | 17           | 0.70           | 0.702          | -0.05      |     |
| intervention:fat_mass_pc | 1            | 17           | 0.01           | 0.905          | -0.05      |     |

**Table S32: Effect of (log-) fasting leptin on total food intake [1g]**  
Related to Figure 4

$$\text{total intake}_{kcal} \sim \text{intervention} * \log(\text{leptin}) + (1|\text{subjectID})$$

|                           | <i>numDF</i> | <i>denDF</i> | <i>F-value</i> | <i>p-value</i> | $\omega^2$ |   |
|---------------------------|--------------|--------------|----------------|----------------|------------|---|
| log(leptin)               | 1            | 20.0         | 4.09           | 0.057          | 0.12       | . |
| intervention              | 1            | 16.9         | 3.83           | 0.067          | 0.13       | . |
| intervention: log(leptin) | 1            | 17.0         | 0.96           | 0.340          | <0.01      |   |

**Table S33: Effect of UMP intervention on (log-) serum leptin levels [1g]**  
Related to Figure 4

$$\log(\text{leptin}) \sim \text{intervention} * \text{timepoint} + (1|ID)$$

|                        | <i>numDF</i> | <i>denDF</i> | <i>F-value</i> | <i>p-value</i> | $\omega^2$ |   |
|------------------------|--------------|--------------|----------------|----------------|------------|---|
| timepoint              | 2            | 90           | 4.60           | 0.013          | 0.07       | * |
| intervention           | 1            | 90           | 2.34           | 0.129          | 0.01       |   |
| intervention:timepoint | 2            | 90           | 0.15           | 0.862          | -0.02      |   |
|                        | t-contrast   |              |                |                |            |   |
|                        |              |              | <i>t-value</i> | <i>p-value</i> |            |   |
| Timepoint 0h vs. 2h    |              |              | 2.99           | 0.011          |            | * |
| Timepoint 0h vs. 4h    |              |              | 1.05           | 0.650          |            |   |
| Timepoint 2h vs. 4h    |              |              | -1.94          | 0.159          |            |   |

**Table S34: Effect of UMP intervention on serum amino acids levels [1g]**  
 Related to Figure 4

$$\text{amino acid} \sim \text{intervention} * \text{timepoint} + (1|ID)$$

|                        | <i>numDF</i> | <i>denDF</i> | <i>F-value</i> | <i>p-value</i> | <i>Bonferroni corrected p-value</i> | $\omega^2$ |     |
|------------------------|--------------|--------------|----------------|----------------|-------------------------------------|------------|-----|
| <b>Alanine</b>         |              |              |                |                |                                     |            |     |
| timepoint              | 2            | 14910311     | 33.49          | <0.001         | <0.001                              | <0.001     | *** |
| intervention           | 1            | 3187520      | <0.01          | 0.9822         | 19.644                              | <0.001     |     |
| intervention:timepoint | 2            | 14493229     | 0.36           | 0.7007         | 14.014                              | <0.001     |     |
| t-contrast             |              |              |                |                |                                     |            |     |
|                        |              |              | <i>t-value</i> | <i>p-value</i> |                                     |            |     |
| Timepoint 0h vs. 2h    |              |              | -7.163         | <0.001         |                                     |            | *** |
| Timepoint 0h vs. 4h    |              |              | -7.04003       | <0.001         |                                     |            | *** |
| <b>Arginine</b>        |              |              |                |                |                                     |            |     |
| timepoint              | 2            | 15526522     | 2.08           | 0.1254         | 2.508                               | <0.001     |     |
| intervention           | 1            | 3315863      | 0.67           | 0.4132         | 8.265                               | <0.001     |     |
| intervention:timepoint | 2            | 15089554     | 0.02           | 0.9777         | 19.555                              | <0.001     |     |
| <b>Asparagine</b>      |              |              |                |                |                                     |            |     |
| timepoint              | 2            | 5716132      | 15.05          | <0.001         | <0.001                              | <0.001     | *** |
| intervention           | 1            | 1262563      | 0.06           | 0.8115         | 16.229                              | <0.001     |     |
| intervention:timepoint | 2            | 5586817      | 1.07           | 0.3414         | 6.8275                              | <0.001     |     |
| t-contrast             |              |              |                |                |                                     |            |     |
|                        |              |              | <i>t-value</i> | <i>p-value</i> |                                     |            |     |
| Timepoint 0h vs. 2h    |              |              | -4.77483       | <0.001         |                                     |            | *** |
| Timepoint 0h vs. 4h    |              |              | -4.74728       | <0.001         |                                     |            | *** |
| <b>Aspartic Acid</b>   |              |              |                |                |                                     |            |     |
| timepoint              | 2            | 91.48        | 9.7046         | 0.0001506      | 0.003                               | 0.16       | **  |
| intervention           | 1            | 91.746       | 0.6803         | 0.4116174      | 8.232                               | -3.42E-03  |     |
| intervention:timepoint | 2            | 91.483       | 0.4446         | 0.642453       | 12.849                              | -0.01      |     |
| t-contrast             |              |              |                |                |                                     |            |     |
|                        |              |              | <i>t-value</i> | <i>p-value</i> |                                     |            |     |
| Timepoint 0h vs. 2h    |              |              | -3.721         | <0.001         |                                     |            | *** |
| Timepoint 0h vs. 4h    |              |              | -4.403         | <0.001         |                                     |            | *** |
| <b>Cysteine</b>        |              |              |                |                |                                     |            |     |
| timepoint              | 2            | 91.071       | 0.5314         | 0.5896         | 11.791                              | -0.01      |     |
| intervention           | 1            | 91.169       | 1.2211         | 0.272          | 5.441                               | 2.37E-03   |     |
| intervention:timepoint | 2            | 91.073       | 0.5817         | 0.561          | 11.221                              | -8.97E-03  |     |
| <b>Glutamic Acid</b>   |              |              |                |                |                                     |            |     |
| timepoint              | 2            | 22544376     | 3.0162         | 0.04899        | 0.980                               | <0.001     |     |
| intervention           | 1            | 4775514      | 0.0057         | 0.93972        | 18.794                              | <0.001     |     |

|                        |   |                      |                |                |        |           |     |
|------------------------|---|----------------------|----------------|----------------|--------|-----------|-----|
| intervention:timepoint | 2 | 21879080             | 0.2205         | 0.80211        | 16.042 | <0.001    |     |
|                        |   | <b>Glutamine</b>     |                |                |        |           |     |
| timepoint              | 2 | 50586338             | 3.6148         | 0.02692        | 0.538  | <0.001    |     |
| intervention           | 1 | 10576927             | 0.0686         | 0.79338        | 15.867 | <0.001    |     |
| intervention:timepoint | 2 | 48981843             | 0.899          | 0.40699        | 8.140  | <0.001    |     |
|                        |   | <b>Glycine</b>       |                |                |        |           |     |
| timepoint              | 2 | 91.048               | 0.6012         | 0.5503         | 11.006 | -8.55E-03 |     |
| intervention           | 1 | 91.114               | 0.1287         | 0.7207         | 14.413 | -9.45E-03 |     |
| intervention:timepoint | 2 | 91.049               | 0.0123         | 0.9878         | 19.756 | -2.00E-02 |     |
|                        |   | <b>Histidine</b>     |                |                |        |           |     |
| timepoint              | 2 | 2611389              | 4.877          | 0.00762        | 0.152  | <0.001    |     |
| intervention           | 1 | 602405               | 2.3304         | 0.12687        | 2.537  | <0.001    |     |
| intervention:timepoint | 2 | 2570026              | 1.0202         | 0.36052        | 7.210  | <0.001    |     |
|                        |   | <b>Isoleucine</b>    |                |                |        |           |     |
| timepoint              | 2 | 9312478              | 2.5281         | 0.07981        | 1.596  | <0.001    |     |
| intervention           | 1 | 2017368              | 0.9192         | 0.33768        | 6.754  | <0.001    |     |
| intervention:timepoint | 2 | 9072415              | 0.7068         | 0.49321        | 9.864  | <0.001    |     |
|                        |   | <b>Leucine</b>       |                |                |        |           |     |
| timepoint              | 2 | 12545827             | 2.8267         | 0.05921        | 1.184  | <0.001    |     |
| intervention           | 1 | 2693797              | 1.4466         | 0.22907        | 4.581  | <0.001    |     |
| intervention:timepoint | 2 | 12204017             | 0.5586         | 0.57201        | 11.440 | <0.001    |     |
|                        |   | <b>Lysine</b>        |                |                |        |           |     |
| timepoint              | 2 | 10137859             | 4.9152         | 0.007334       | 0.147  | <0.001    |     |
| intervention           | 1 | 2191024              | 0.0557         | 0.813502       | 16.270 | <0.001    |     |
| intervention:timepoint | 2 | 9872603              | 0.1278         | 0.880013       | 17.600 | <0.001    |     |
|                        |   | <b>Methionine</b>    |                |                |        |           |     |
| timepoint              | 2 | 7596567              | 7.8485         | 0.0003903      | 0.867  | <0.001    |     |
| intervention           | 1 | 1657912              | 2.5129         | 0.112916       | 7.867  | <0.001    |     |
| intervention:timepoint | 2 | 7409971              | 0.3708         | 0.6901931      | 16.155 | <0.001    |     |
|                        |   | <b>Phenylalanine</b> |                |                |        |           |     |
| timepoint              | 2 | 7596567              | 7.8485         | 0.0003903      | 0.008  | <0.001    | **  |
| intervention           | 1 | 1657912              | 2.5129         | 0.112916       | 2.258  | <0.001    |     |
| intervention:timepoint | 2 | 7409971              | 0.3708         | 0.6901931      | 13.804 | <0.001    |     |
|                        |   | t-contrast           |                |                |        |           |     |
|                        |   |                      | <i>t-value</i> | <i>p-value</i> |        |           |     |
| Timepoint 0h vs. 2h    |   |                      | -3.73          | <0.001         |        |           | *** |
| Timepoint 0h vs. 4h    |   |                      | -3.01          | 0.008          |        |           | **  |
|                        |   | <b>Proline</b>       |                |                |        |           |     |
| timepoint              | 2 | 25777920             | 30.6972        | <0.001         | <0.001 | <0.001    | *** |
| intervention           | 1 | 5446540              | 1.1415         | 0.2853         | 5.707  | <0.001    |     |
| intervention:timepoint | 2 | 25006100             | 0.3181         | 0.7275         | 14.551 | <0.001    |     |
|                        |   | t-contrast           |                |                |        |           |     |
|                        |   |                      | <i>t-value</i> | <i>p-value</i> |        |           |     |
| Timepoint 0h vs. 2h    |   |                      | -5.72          | <0.001         |        |           | *** |
| Timepoint 0h vs. 4h    |   |                      | -7.51          | <0.001         |        |           | *** |

| Serine                 |   |          |        |          |        |        |  |
|------------------------|---|----------|--------|----------|--------|--------|--|
| timepoint              | 2 | 1886950  | 0.8161 | 0.4421   | 8.843  | <0.001 |  |
| intervention           | 1 | 447934   | 1.1767 | 0.278    | 5.561  | <0.001 |  |
| intervention:timepoint | 2 | 1865065  | 0.6102 | 0.5433   | 10.865 | <0.001 |  |
| Threonine              |   |          |        |          |        |        |  |
| timepoint              | 2 | 9888738  | 4.0434 | 0.01754  | 0.351  | <0.001 |  |
| intervention           | 1 | 2138334  | 0.0002 | 0.9902   | 19.803 | <0.001 |  |
| intervention:timepoint | 2 | 9630878  | 0.1724 | 0.84162  | 16.832 | <0.001 |  |
| Tryptophane            |   |          |        |          |        |        |  |
| timepoint              | 2 | 20229362 | 5.0641 | 0.006319 | 0.126  | <0.001 |  |
| intervention           | 1 | 4294519  | 4.7597 | 0.029134 | 0.583  | <0.001 |  |
| intervention:timepoint | 2 | 19639832 | 1.3101 | 0.269788 | 5.396  | <0.001 |  |
| Tyrosine               |   |          |        |          |        |        |  |
| timepoint              | 2 | 37606979 | 5.2049 | 0.00549  | 0.110  | <0.001 |  |
| intervention           | 1 | 7895630  | 1.0297 | 0.31024  | 6.205  | <0.001 |  |
| intervention:timepoint | 2 | 36440584 | 0.3136 | 0.73084  | 14.617 | <0.001 |  |
| Valine                 |   |          |        |          |        |        |  |
| timepoint              | 2 | 21364714 | 5.5714 | 0.003805 | 0.076  | <0.001 |  |
| intervention           | 1 | 4529931  | 1.2786 | 0.258166 | 5.163  | <0.001 |  |
| intervention:timepoint | 2 | 20737647 | 0.9576 | 0.383832 | 7.677  | <0.001 |  |

## Supraphysiological circulating uridine does not alter food behavior

**Table S35: Effect of 1 g oral UMP supplementation on uridine levels [1 g]**

Related to Figure 5A

$$\begin{aligned}
 & \text{uridine} \sim \text{treatment} * \text{timepoint} + \text{treatment: drymass}_{kg} + \text{treatment: fatmass}_{kg} \\
 & + \text{treatment: sex} + (1 | \text{subjectID})
 \end{aligned}$$

|                              | <i>numDF</i> | <i>denDF</i> | <i>F-value</i> | <i>p-value</i> | $\omega^2$ |     |
|------------------------------|--------------|--------------|----------------|----------------|------------|-----|
| intervention                 | 1            | 103.12       | 8.09           | 0.005          | 0.06       | **  |
| timepoint                    | 2            | 103.12       | 80.16          | <0.001         | 0.60       | *** |
| intervention:timepoint       | 2            | 103.12       | 108.87         | <0.001         | 0.67       | *** |
| intervention:fatfree_mass_kg | 2            | 25.70        | 0.96           | 0.397          | -2.88e-03  |     |
| intervention:fat mass kg     | 2            | 25.70        | 0.83           | 0.448          | -0.01      |     |
| intervention:gender          | 2            | 25.70        | 0.77           | 0.474          | -0.02      |     |

**Table S36: Effect of UMP supplementation on uridine levels, post-hoc [1 g]**

Related to Figure 5A

Post-analysis of the effect of treatment on blood uridine levels; the posthoc-test revealed that uridine concentrations are significantly higher under UMP treatment after 2 and 4 hours.

|               | <i>Estimate</i> | <i>Std. error</i> | <i>t</i> | <i>p-value</i> |     |
|---------------|-----------------|-------------------|----------|----------------|-----|
| U@t0 – P@t0   | - 0.386         | 0.469             | 0.882    | 0.413          |     |
| U@t+2 – P@t+2 | 9.174           | 0.469             | 19.558   | <0.001         | *** |
| U@t+4 – P@t+4 | 3.018           | 0.469             | 6.435    | <0.001         | *** |

Note. Std. error = Standard error, P= placebo U = treatment with UMP, @t0 = initial timepoint, @t+2 = after 2 hours, @t+4 = after 4 hours.

**Table S37: Effect of UMP supplementation on hunger ratings [1 g]**

Related to Figure 5

Initial hunger ratings were subtracted from the average hunger ratings during the buffet.

$$hunger@buffet - hunger@t0 \sim intervention * fatfree\_mass_{kg} + day + sex + (1|ID)$$

|                              | <i>numDF</i> | <i>denDF</i> | <i>F-value</i> | <i>p-value</i> | $\omega^2$  |   |
|------------------------------|--------------|--------------|----------------|----------------|-------------|---|
| intervention                 | 1            | 20.03        | 0.016          | 0.901          | -0.05       |   |
| intervention:fatfree_mass_kg | 1            | 19.87        | 0.005          | 0.947          | <b>0.07</b> |   |
| fatfree_mass_kg              | 1            | 15.86        | 2.435          | 0.138          | <b>0.11</b> |   |
| day                          | 1            | 19.95        | 3.674          | 0.70           | 0.08        | + |
| Gender                       | 1            | 15.873       | 2.560          | 0.129          | -0.05       |   |

Note. Day = measurement day (day1 or day 2)

**Table S38: Effect of UMP supplementation on caloric intake [1 g]**

Related to Figure 5

$$intake\_kcal \sim intervention * fatfree\_mass_{kg} + fat\_mass_{kg} + (1|ID)$$

|                              | <i>numDF</i> | <i>denDF</i> | <i>F-value</i> | <i>p-value</i> | $\omega^2$   |   |
|------------------------------|--------------|--------------|----------------|----------------|--------------|---|
| intervention                 | 1            | 20.99        | 0.015          | 0.902          | -0.04        |   |
| intervention:fatfree_mass_kg | 1            | 20.995       | 0.0324         | 0.859          | <b>0.12</b>  |   |
| fatfree_mass_kg              | 1            | 17.593       | 3.656          | 0.072          | <b>-0.04</b> | + |

**Table S39: Effect of uridine levels on caloric intake [1 g]**

Related to Figure 5B

$$intake_{kcal} \sim uridine_{t-1} + uridine_{t-1}^2 + (1|ID)$$

|                | <i>numDF</i> | <i>denDF</i> | <i>F-value</i> | <i>p-value</i> | $\omega^2$ |   |
|----------------|--------------|--------------|----------------|----------------|------------|---|
| Uridine_tm1    | 1            | 128.72       | 5.609          | 0.019          | 0.03       | * |
| Uridine_tm1 ^2 | 1            | 127.58       | 5.432          | 0.021          | 0.03       | * |

## **Supplementary Figures**

Figure S1

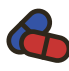

# Placebo vs. [0.5g] UMP

placebo ● 0h ● 2h ● 3.5h  
UMP [0.5g] ● 0h ● 2h ● 3.5h

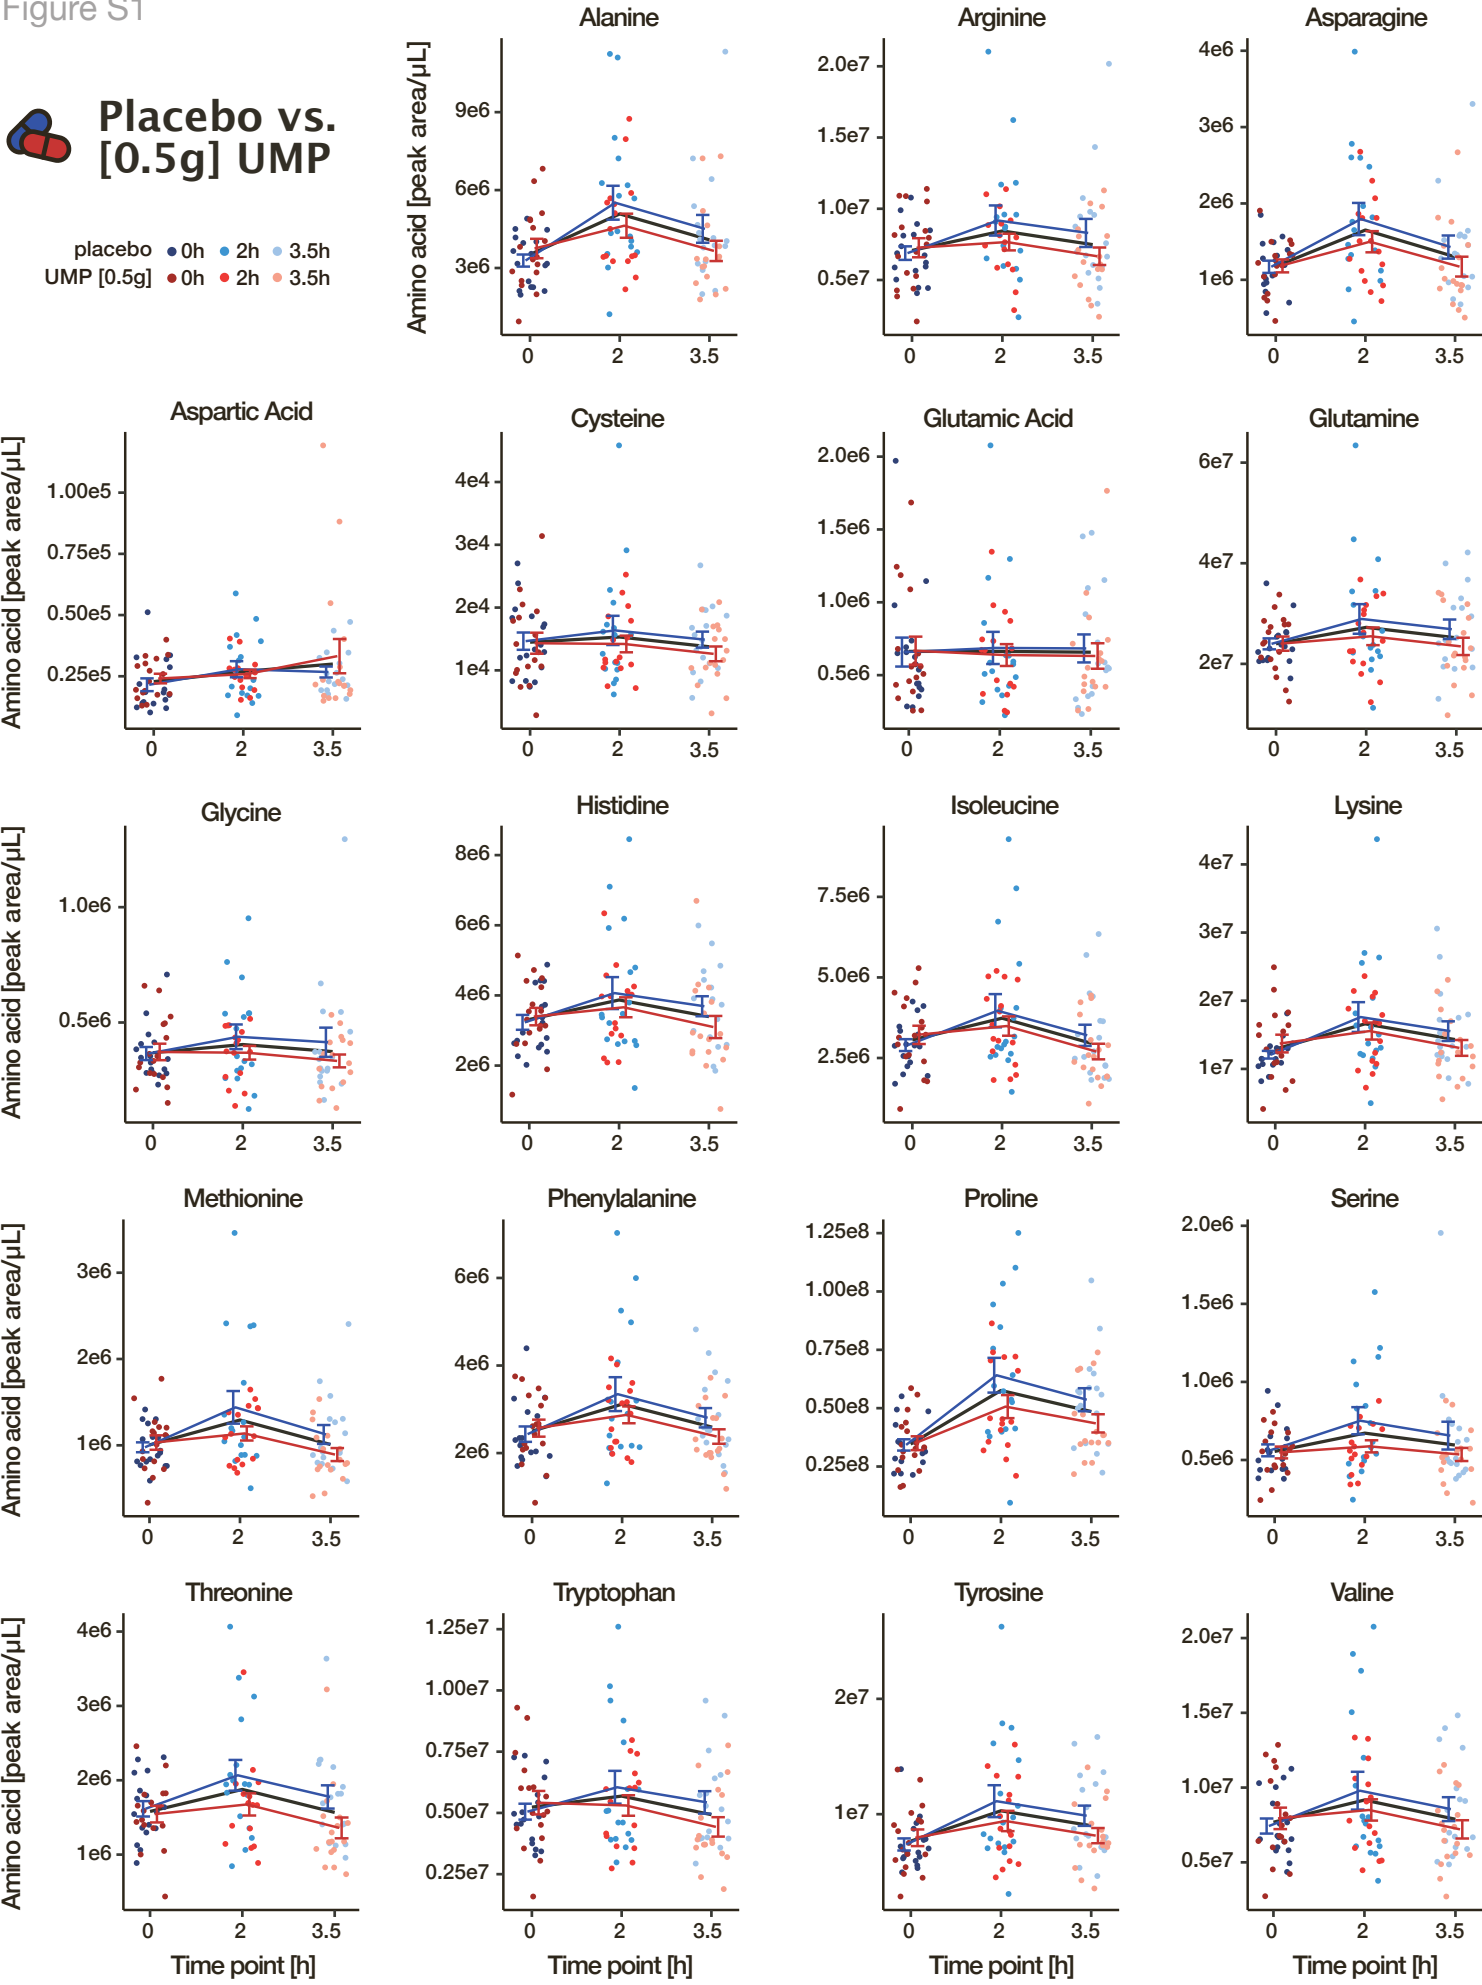



**Supplemental Figure 1:** Serum amino acids as a function of time in the study [0.5g]. In all panels, placebo and intervention (0.5g UMP) are shown in blue and red respectively. Thin lines and error bars represent the mean and standard error for each session, thick black lines the grand average, and lighter colors mean later time points. Related to Figure 4.

Figure S2

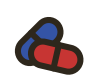

## Placebo vs. [1g] UMP

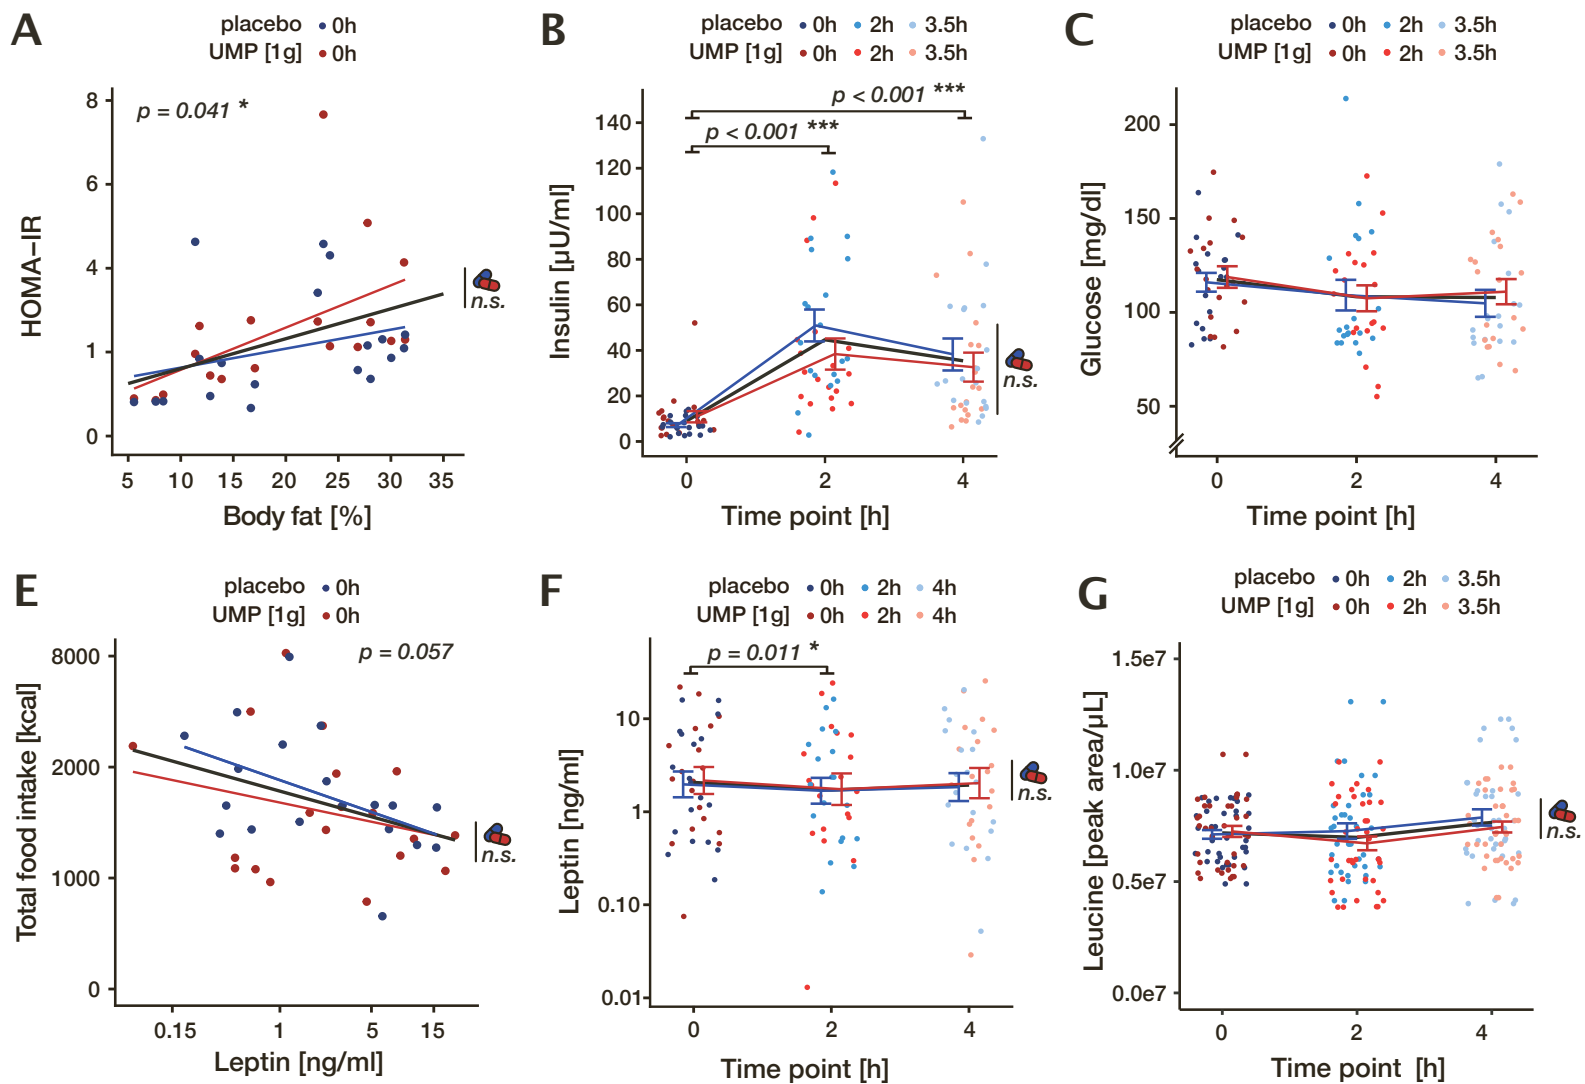

**Supplemental Figure 2:** Metabolic profile of the participants in the study [1g]. **A** Insulin resistance, as measured by HOMA-IR = (fasting glucose [mg/dL] x fasting insulin [ mU/L]) / 405, as function of adiposity. Linear fit. Table S28. **B-C** Serum insulin (B) and glucose (C) as a function of time. Statistics correspond to the *post-hoc* comparison between time-points. Table S29 and S30. **D** Basal serum leptin increases exponentially as a function of adiposity. Statistics correspond to the fitted model:  $\text{Leptin} \sim \beta_0 + \exp(\beta_1 * \text{bodyfat})$ . Table S31. **E** Total food intake as a function of the (log-) basal serum leptin. Linear fit. Table S32. **F** Serum leptin (log scale) as a function of time. Statistics correspond to the *post-hoc* comparison between time-points. Table S33. **G** Serum leucine as a function of time. Statistics correspond to the *post-hoc* comparison between time-points. Table S34. In all panels, placebo and intervention (1g UMP) are shown in blue and red respectively. Thin lines and error bars represent the mean and standard error (B-C, F-G) or the best fit (A, D, E) for each session, thick black lines the grand average, and lighter colors mean later time points. The pill symbol with “n.s.” indicate the absence of any significant difference (main effect or interaction) between the UMP and the placebo conditions. Related to Figure 4.

Figure S3

# Placebo vs. [1g] UMP

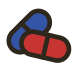

placebo ● 0h ● 2h ● 4h  
UMP [1g] ● 0h ● 2h ● 4h

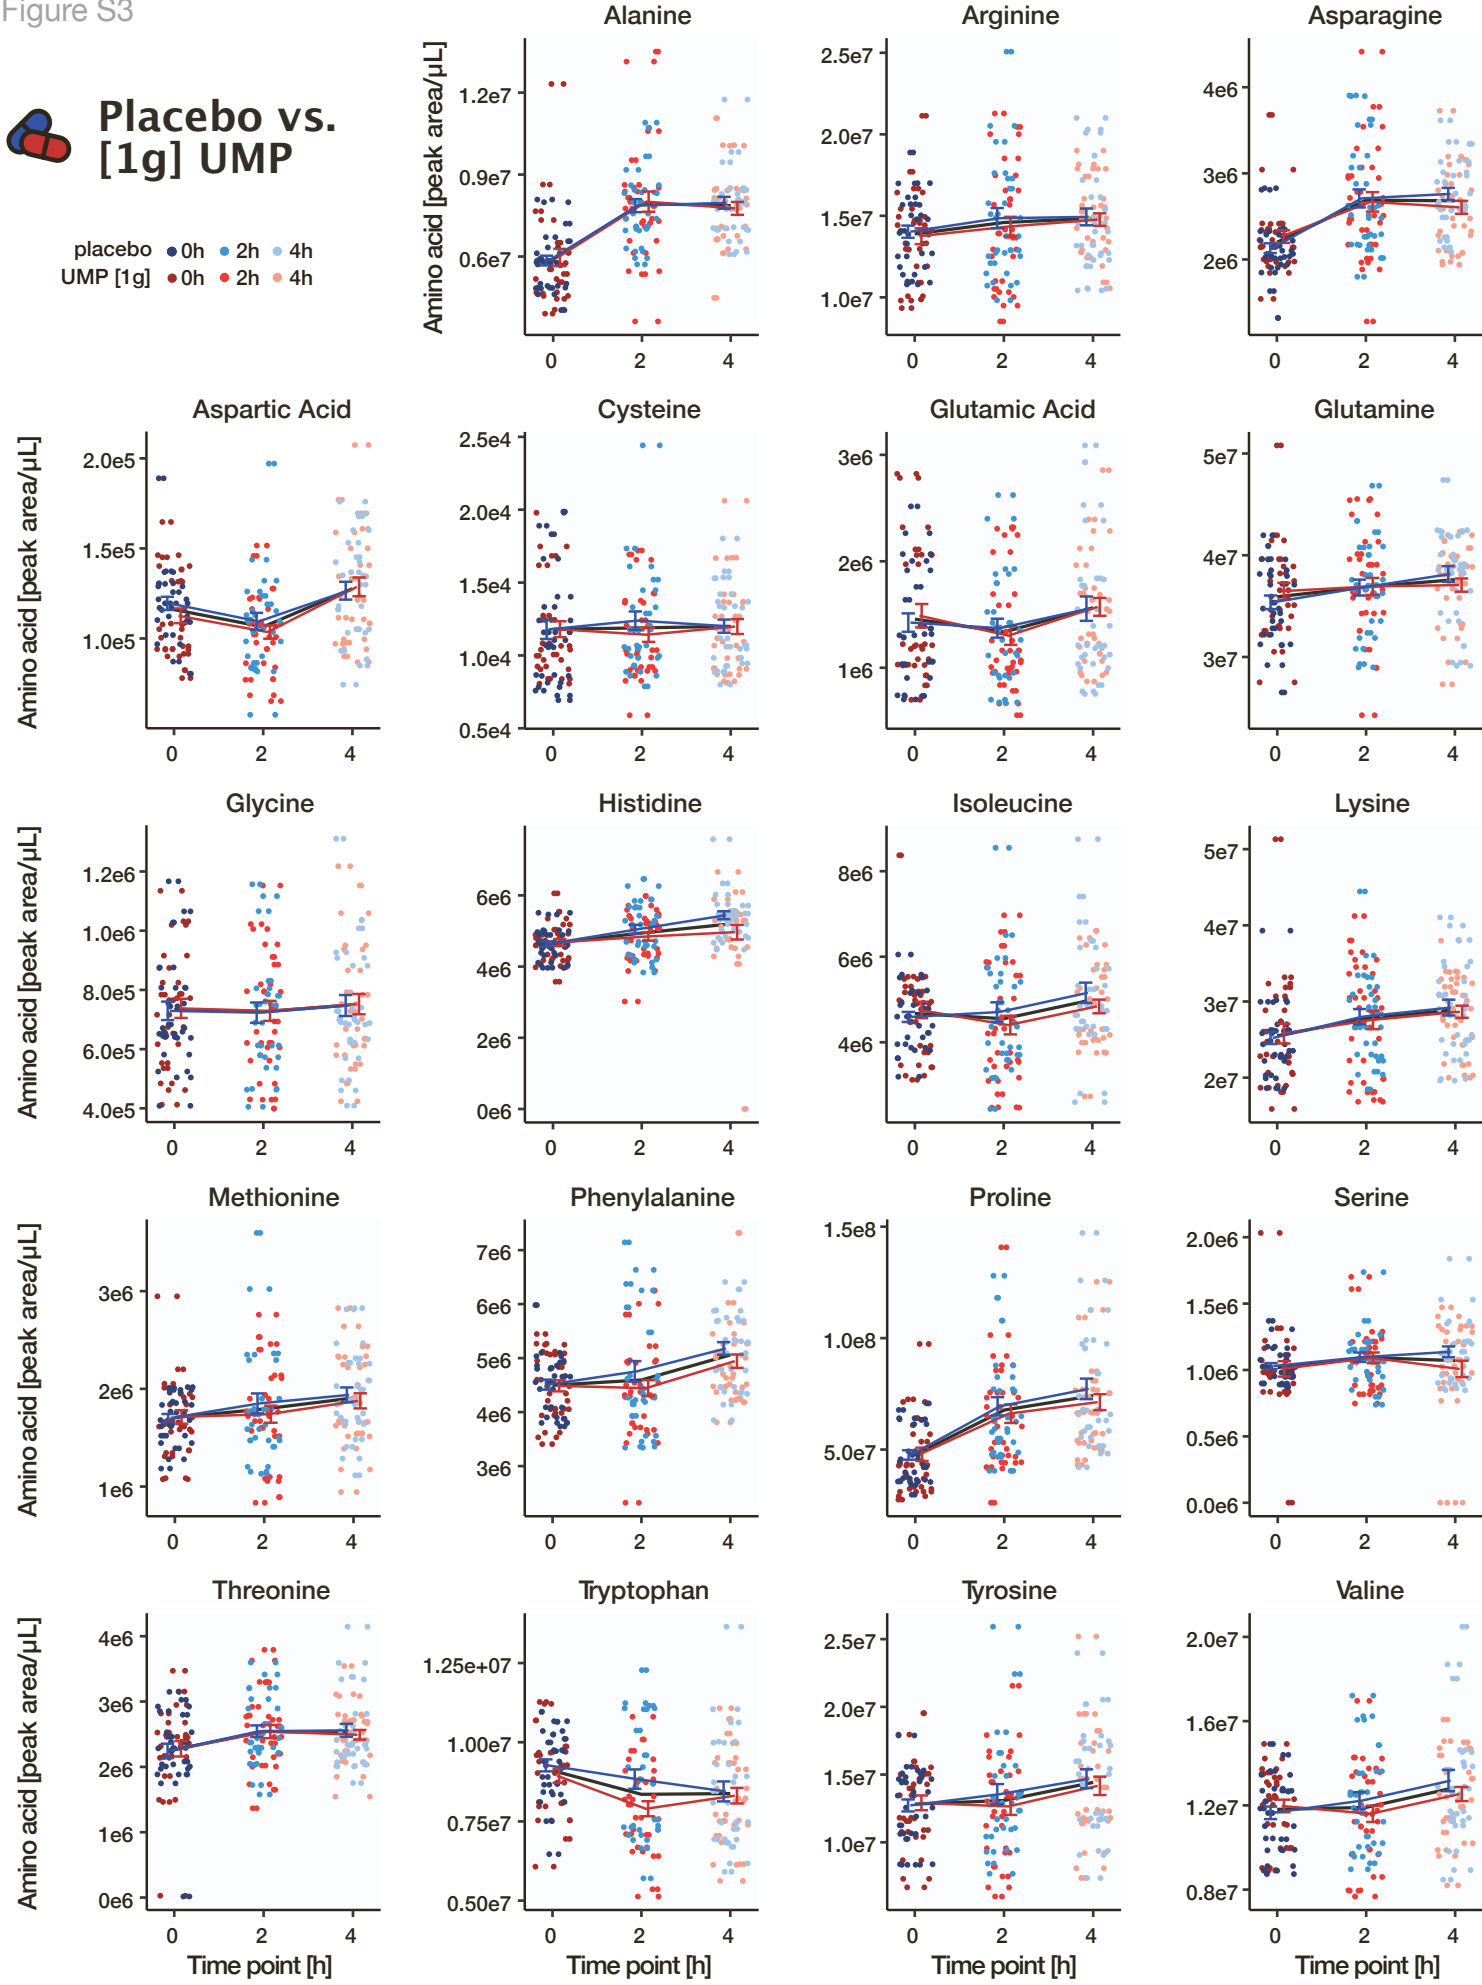

**Supplemental Figure 3:** Serum amino acids as a function of time in the study [1g]. In all panels, placebo and intervention (1g UMP) are shown in blue and red respectively. Thin lines and error bars represent the mean and standard error for each session, thick black lines the grand average, and lighter colors mean later time points. Complementary statistics can be found in Table S34. Related to Figure 4.

Figure S4

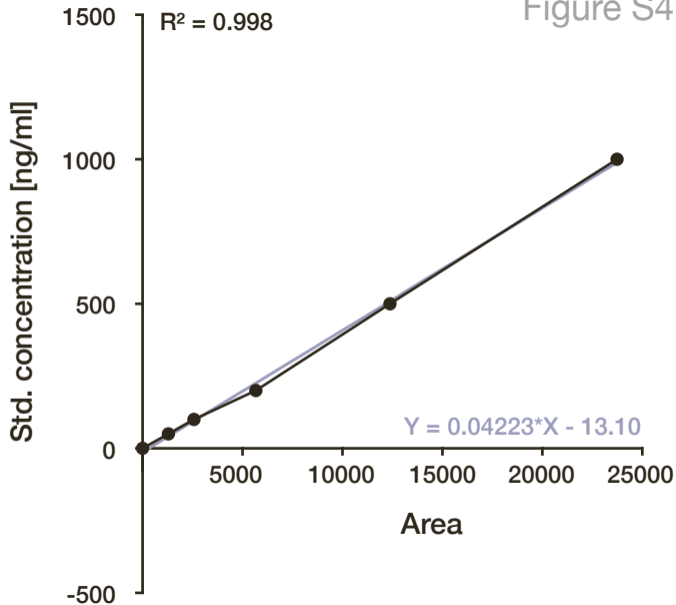

**Supplemental Figure 4:** Standard Curve of the UPLC. Standard Curve of the UPLC for the measurement of uridine concentration in serum. Black dots and the black line are the measured standards, the grey line is standard curve (linear fit, equation given in the bottom right). Related to Ultra-Performance Liquid Chromatography (UPLC) in STAR METHODS.

**A**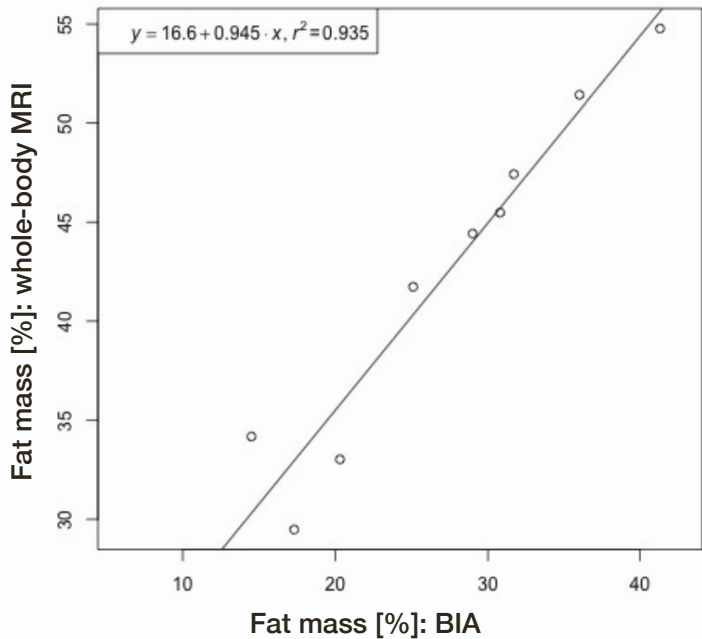**B**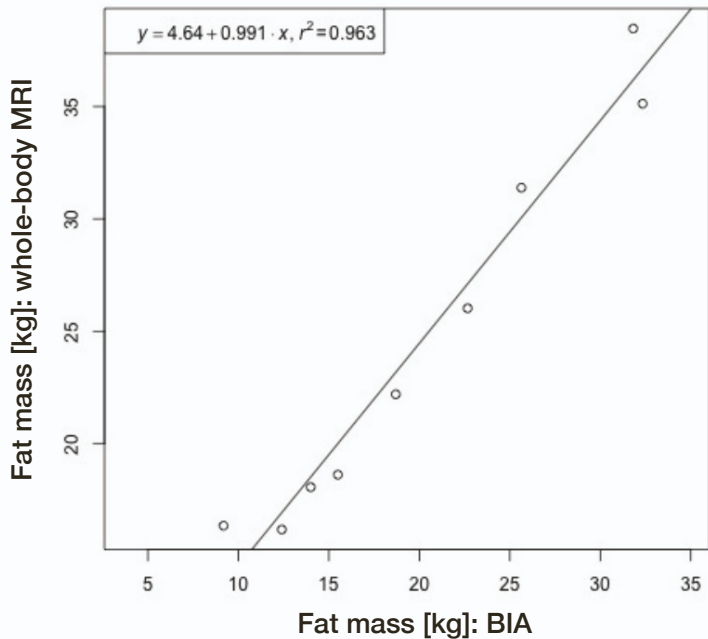



**Supplemental Figure 5:** Correlation between BIA and whole-body MRI measures of body composition. Relative (A) and absolute (B) body fat as estimated by the mBCA 515 Bioelectrical Impedance Scale (x-axis) and by whole-body Magnetic Resonance Imaging (y-axis). Lines represent the best linear fit detailed on the top-left corner of each plot. Related to Body Composition in STAR METHODS.

Figure S6

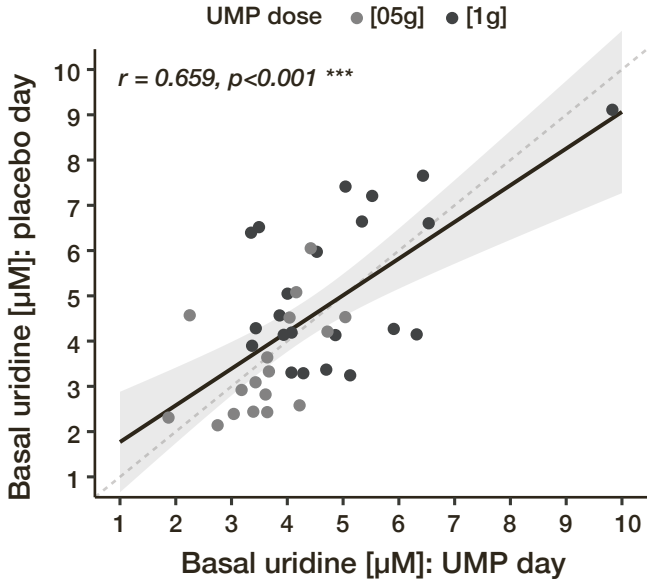

**Supplemental Figure 6:** Correlation between basal uridine levels across testing days. Serum uridine levels measured either before the placebo (x-axis) or before the UMP intervention (y-axis) in the study [0.5g] (gray) and the study [1g] (black). The black line and the shaded area represent respectively to the estimated correlation and its 95% confidence interval. Statistics: Pearson correlation. Related to Figure 3.
